# Supplementary material
Source: PubMed Central journal article supplement (PMC2897334)
Supplement: supp_192_14_3713__1.pdf [file supp_192_14_3713__1.pdf]

## Appendix

### Supplementary Figures

|                                                                                                                             |   |
|-----------------------------------------------------------------------------------------------------------------------------|---|
| <b>S1:</b> <i>A GFP control immunopurification reveals non-specific interactions</i>                                        | 2 |
| <b>S2:</b> <i>PAP I-GFP immunopurification from wild-type cells in the presence of RNase A, during stationary phase</i>     | 3 |
| <b>S3:</b> <i>Examples of the correction for the heavy labeled <math>\Delta sprE</math> peptides</i>                        | 4 |
| <b>S4:</b> <i>Relative quantification of PAP I interacting partners with switched isotopic labeling and Lys-N digestion</i> | 5 |
| <b>S5:</b> <i>Single confirmed SprE peptide during stationary phase</i>                                                     | 6 |
| <b>S6:</b> <i>PAP I-GFP immunopurification from cells overproducing SprE (rssA2)</i>                                        | 7 |

### Supplementary Tables

|                                                                                     |    |
|-------------------------------------------------------------------------------------|----|
| <b>S1:</b> <i>PAP I-GFP isolation from wild type cells</i>                          | 8  |
| <b>S2:</b> <i>Control GFP isolations</i>                                            | 10 |
| <b>S3:</b> <i>PAP I-GFP isolation from wild type cells in the presence of RNase</i> | 12 |
| <b>S4:</b> <i>PAP I-GFP isolation in <math>\Delta sprE</math> cells</i>             | 13 |
| <b>S5:</b> <i>Detection of Interacting Partners in Flow Through</i>                 | 15 |
| <b>S6:</b> <i>PAP I-GFP isolation from rssA2 cells</i>                              | 16 |
| <b>S7:</b> <i>PAP I-GFP isolation in <math>\Delta rpoS</math> cells</i>             | 17 |

**Supplementary figure S1:** *A GFP control immunopurification reveals non-specific interactions*

**Supplementary figure S2: *PAP I-GFP* immunopurification from wild-type cells in the presence of RNase A, during stationary phase**

A.

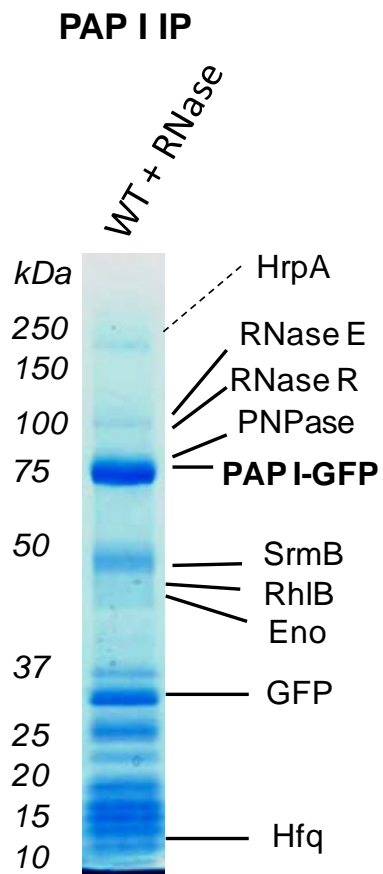

B.

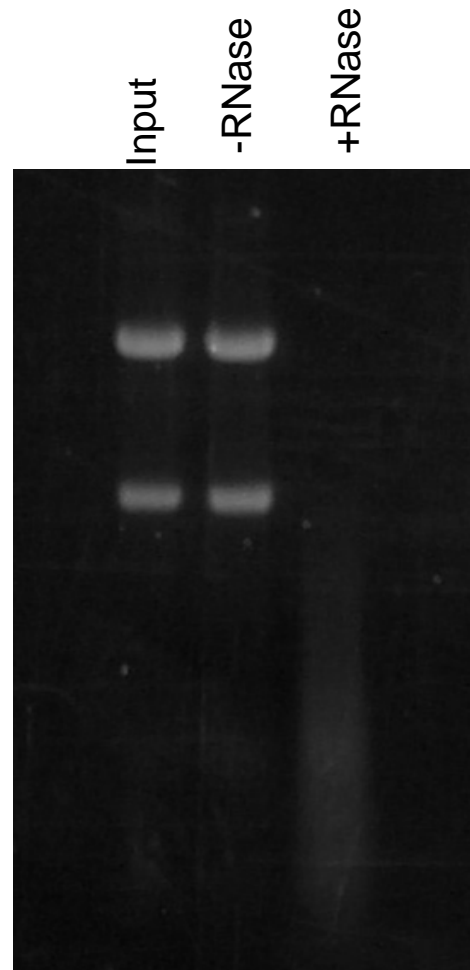

**Supplementary figure S3: Examples of the correction for the heavy labeled  $\Delta sprE$  peptides**

**PAP I**

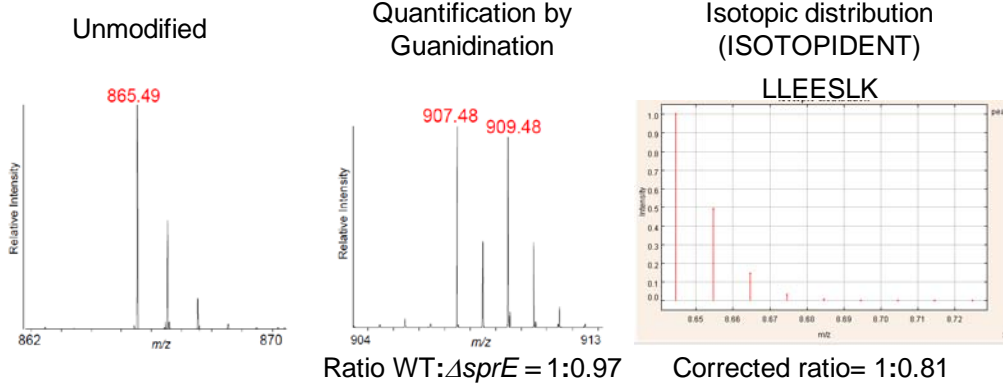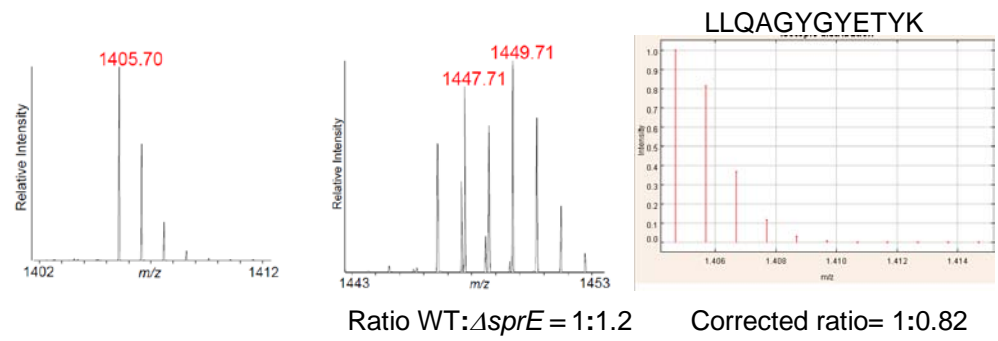

**HrpA**

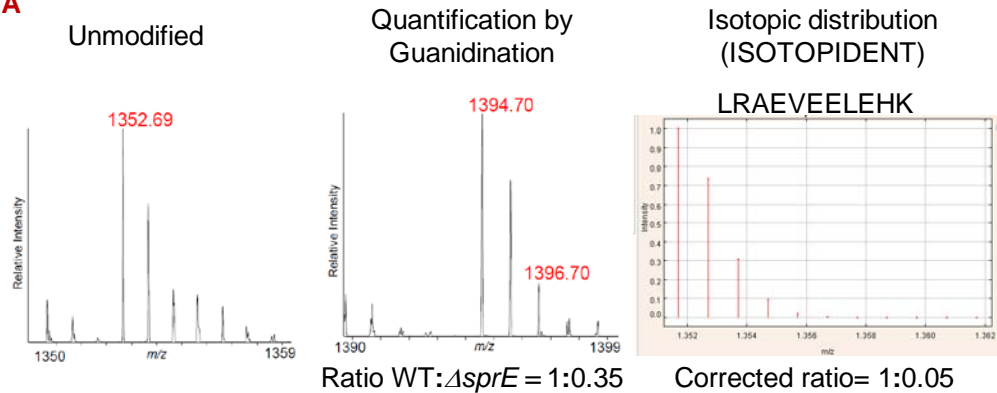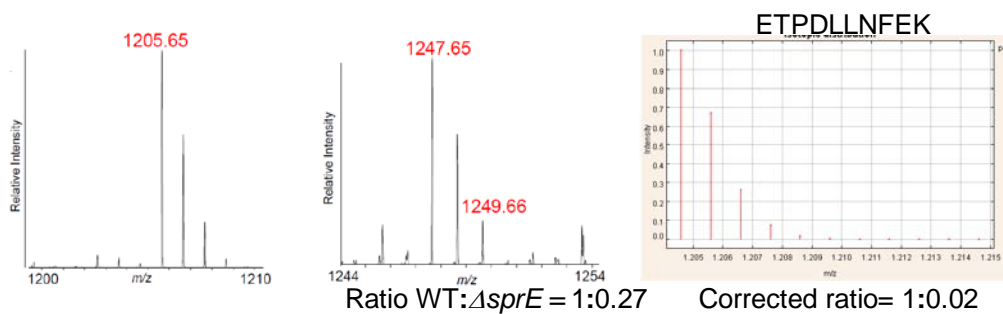

**Supplementary figure S4:** *Relative quantification of PAP I interacting partners using Lys-N digestion and switched isotopic labeling ( $\Delta sprE$  peptides derivatized with  $[N^{14}]$ - and the wild-type peptides with  $[N^{15}]$ -O-methylisourea).*

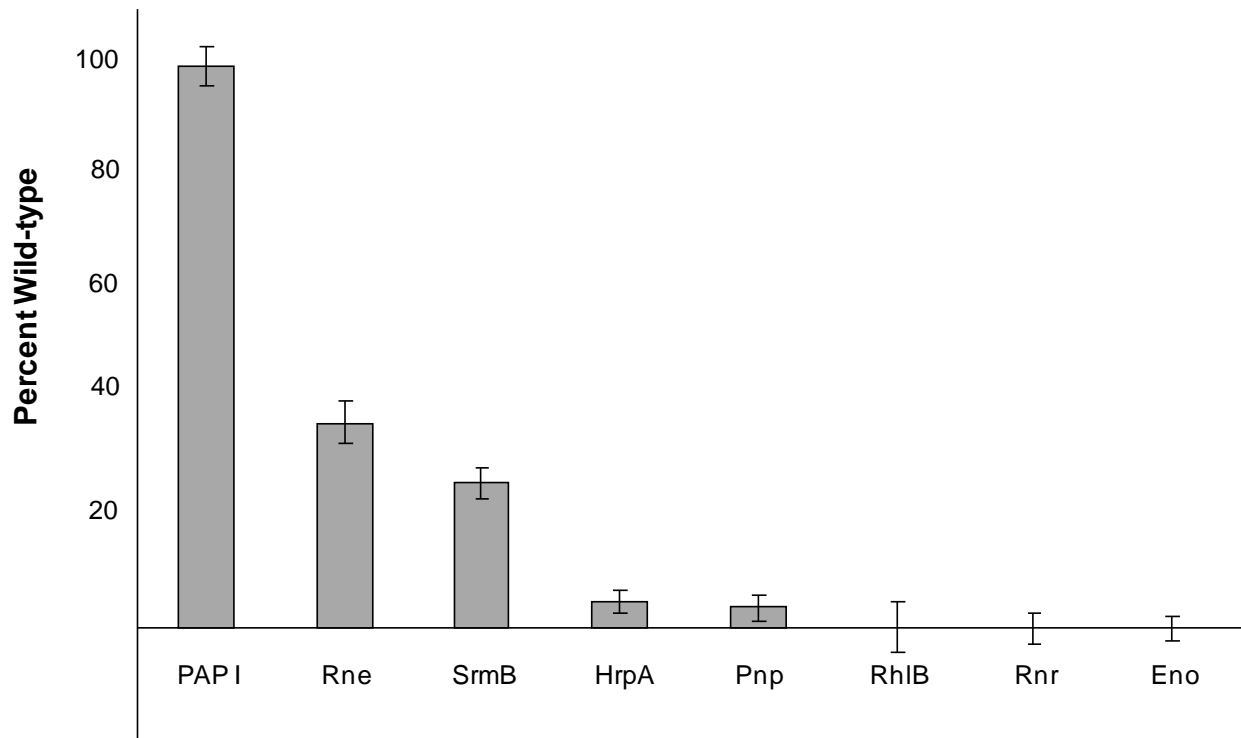

**Supplementary figure S5:** *Single confirmed SprE peptide during stationary phase*

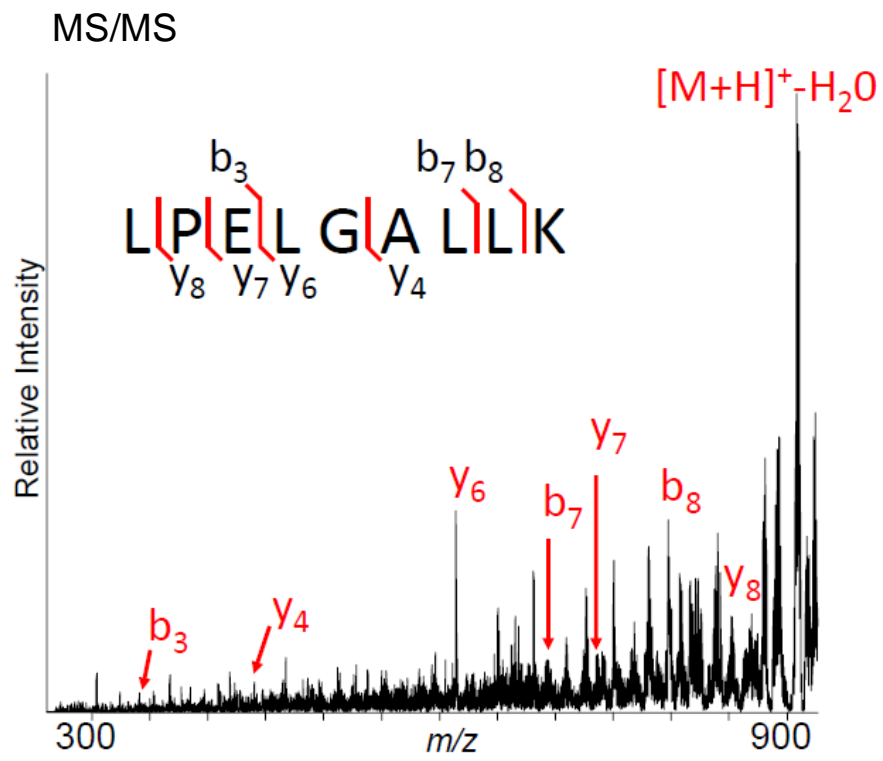

**Supplementary figure S6:** *PAP I-GFP immunopurification from cells overproducing SprE (rssA2)*

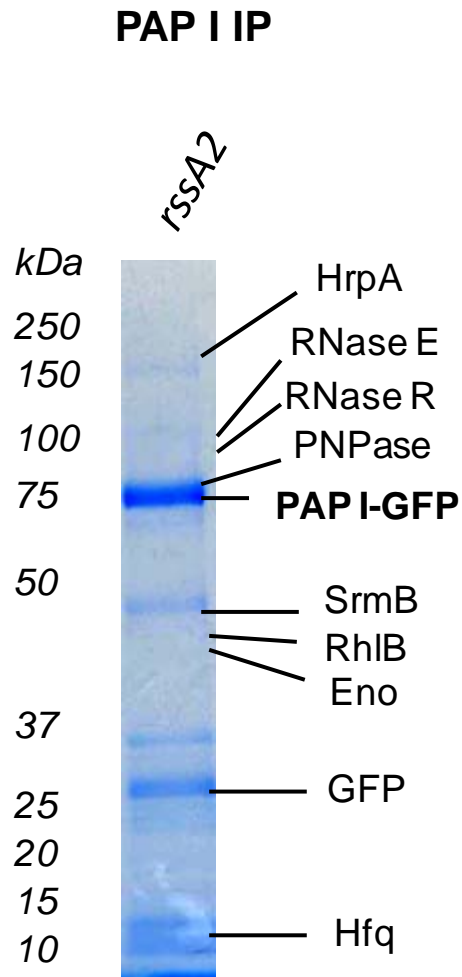

**Supplementary Table S1:** PAP I-GFP isolation from wild type cells

| Protein Information |           | Summary     |            | Exponential Phase  |                     |                    |                                                | Stationary Phase   |                     |                    |                                                      |
|---------------------|-----------|-------------|------------|--------------------|---------------------|--------------------|------------------------------------------------|--------------------|---------------------|--------------------|------------------------------------------------------|
| Name                | gi #      | Exponential | Stationary | # peptides from MS | % sequence coverage | XProteo Score [d'] | Peptides confirmed by MS/MS                    | # peptides from MS | % sequence coverage | XProteo Score [d'] | Peptides confirmed by MS/MS                          |
| GFP-tag             | 93278674  | +           | +          | 11                 | 43.1%               | 7.5                | AEVKFEGDTLVNR<br>SAMPEGYVQER<br>GIDFKEDGNILGHK | 10                 | 32.5%               | 9.6                | FEGDTLVNR<br>TIFFKDDGNYK                             |
| PAP I               | 89107024  | +           | +          | 21                 | 48.4%               | 30.6               | AGYAEWLVGGGVR<br>DIWQLQLR<br>ISPETAEPIPR       | 22                 | 45.7%               | 24.1               | LATLLNDIAPPAR<br>DNIFGSIEEDAQR                       |
| Rne                 | 26247224  | +           | +          | 29                 | 37.7%               | 22.5               | IEPSLEAAFVDYGAER<br>ALFSGGEETKPTEQPAPK         | 29                 | 46.5%               | 22.7               | GMLNELDEEPSR<br>ISPETAEPIPR<br>DFDVTTNATPEQVR        |
| Pnp                 | 110643405 | +           | +          | 15                 | 19.0%               | 11.2               | GDISEFAPR<br>IEEITAEIEVGR                      | 22                 | 45.7%               | 24.1               | GDISEFAPR<br>EGRPSEGETLIAR<br>IEEITAEIEVGR           |
| Eno                 | 15803300  | +           | +          | 10                 | 38.1%               | 3.5                | IQLVGDDLFVTNTK<br>FNQIGSLTETLAAIK              | 14                 | 40.0%               | 3.8                | IQLVGDDLFVTNTK<br>AFTEEFTHFLEELTK                    |
| RhlB                | 148184    | +           | +          | 10                 | 21.1%               | 4.9                | VLESGVDILIGTTR<br>LLQTLIEEWPDR                 | 13                 | 31.3%               | 10.8               | LLQTLIEEWPDR<br>YNPDALMTDLPKPLR                      |
| Hfq                 | 15804761  | +           | +          | 3                  | 15.5%               | 2.7                | GQSLQDPFLNALR<br>LQGQIESFDQFVILLK              | 3                  | 15.5%               | 6.7                | GQSLQDPFLNALRR<br>GQSLQDPFLNALR<br>AKGQSLQDPFLNALR   |
| HrpA                | 75239959  | +           | +          | 20                 | 12.5%               | N/O                | ERGLSLQDLK<br>YVIDPGTAR<br>SLNIDFLLGYLK        | 43                 | 24.7%               | 24.3               | YVIDPGTAR<br>YRPIVEEADDTER                           |
| Rnr                 | 83585083  | +           | +          | 10                 | 5.5%                | N/O                | EFILEHLTK<br>DLPVTIDGEDAR<br>EFILEHLTKR        | 26                 | 36.7%               | 23.9               | EFILEHLTK<br>VNFEPDSAFR<br>DLPLVTIDGEDAR             |
| SmrB                | 75234075  | +           | +          | 16                 | 36.9%               | 11.7               | VHELANWLR<br>LLEDPVEVSANPSTR                   | 23                 | 50.3%               | 18                 | GIDIPDVSHVFNFDMPR<br>AVETLILDEADR<br>LLEDPVEVSANPSTR |
| CsdA*               | 75176236  | -           | +          | -                  | -                   | -                  | -                                              | 33                 | 55.2%               | 37.2               | FLEAEDFDAIIFVR<br>VQQQLESSDLQYR<br>ALLFVENR          |
| SprE                | 26247564  | -           | ?          | -                  | -                   | -                  | -                                              | 3                  | 5.00%               | N/O                | LPELAGLLK                                            |
| RpoC                | 223476    | +           | +          | 29                 | 21.2%               | 15.4               | * See GFP control pullout                      | 36                 | 21.5%               | 17.7               | *See GFP control pullout                             |



|       |           |   |   |    |       |      |  |    |       |      |  |
|-------|-----------|---|---|----|-------|------|--|----|-------|------|--|
| RpoB  | 15804577  | + | + | 30 | 23.3% | 13.4 |  | 32 | 18.5% | 13.4 |  |
| AceE  | 434010    | - | + | -  | -     | -    |  | 26 | 31.1% | 23.6 |  |
| AdhE  | 15801467  | - | + | -  | -     | -    |  | 21 | 28.8% | 14.7 |  |
| PflB  | 15800764  | - | + | -  | -     | -    |  | 25 | 26.1% | 9.8  |  |
| DnaK  | 75235743  | + | + | 17 | 31.3% | 2.5  |  | 20 | 29.3% | 6.1  |  |
| RpsA  | 223404    | + | + | 29 | 50.0% | 38.1 |  | 22 | 46.2% | 19   |  |
| OppA  | 147014    | - | + | -  | -     | -    |  | 20 | 42.6% | 13.4 |  |
| EF-Tu | 26249935  | + | + | 20 | 69.0% | 19.4 |  | 22 | 58.3% | 17.3 |  |
| GatZ  | 75196143  | - | + | -  | -     | -    |  | 12 | 31.6% | 2.2  |  |
| Pgk   | 1942721   | - | + | -  | -     | -    |  | 18 | 52.8% | 7.4  |  |
| SucC  | 115512045 | - | + | -  | -     | -    |  | 14 | 38.0% | 2.8  |  |
| Mdh   | 91074230  | - | + | -  | -     | -    |  | 12 | 41.2% | N/O  |  |
| EF-G  | 33357902  | + | + | 15 | 55.8% | 10.4 |  | 20 | 67.6% | 5.2  |  |
| RbsB  | 3318870   | - | + | -  | -     | -    |  | 14 | 59.2% | 6.8  |  |
| GatY  | 7436618   | - | + | -  | -     | -    |  | 12 | 59.2% | 4.1  |  |
| RplL  | 223571    | + | + | 22 | 67.0% | 23.3 |  | 14 | 52.7% | 2.2  |  |
| RpsC  | 15803841  | + | + | 10 | 38.9% | 1.9  |  | 16 | 51.3% | 8.5  |  |
| RplA  | 81247737  | + | + | 15 | 71.1% | 15.2 |  | 10 | 49.8% | 3.0  |  |
| RplD  | 115514721 | - | + | -  | -     | -    |  | 8  | 42.6% | 2.5  |  |
| Dps   | 91071421  | - | + | -  | -     | -    |  | 16 | 74.9% | 12.1 |  |
| RplI  | 110346152 |   |   | 11 | 70.7% | 6.2  |  | 16 | 70.0% | 16.8 |  |
| RplQ  | 15803821  | - | + | -  | -     | -    |  | 7  | 43.8% | 2.7  |  |
| RpsI  | 223001    | - | + | -  | -     | -    |  | 8  | 48.8% | 2.3  |  |
| RplO  | 606235    | - | + | -  | -     | -    |  | 7  | 44.1% | N/O  |  |
| RplS  | 15803128  | - | + | -  | -     | -    |  | 11 | 69.0% | 2.7  |  |
| RplY  | 12516517  | + | - | 11 | 75.8% | N/O  |  | 9  | 55.8% | N/O  |  |
| AtpB  | 112791342 | + | - | 12 | 35.3% | 3.7  |  | -  | -     | -    |  |
| Rho   | 15833970  | + | - | 15 | 39.8% | 6.2  |  | -  | -     | -    |  |
| PrsA  | 75228259  | + | - | 13 | 45.9% | 7.6  |  | -  | -     | -    |  |
| RplB  | 15803844  | + | - | 18 | 47.8% | 10.4 |  | -  | -     | -    |  |
| RpsB  | 26246115  | + | - | 14 | 56.2% | 11.6 |  | -  | -     | -    |  |
| RplM  | 15803765  | + | - | 15 | 79.7% | 16.2 |  | -  | -     | -    |  |
| RpsJ  | 15803848  | + | - | 10 | 57.7% | N/O  |  | -  | -     | -    |  |

**Supplementary Table S2: Control GFP isolations**

| Name  | gi #      | # of peptides from MS | % sequence coverage | XProteo Score [d'] | Peptides confirmed by MS/MS                            |
|-------|-----------|-----------------------|---------------------|--------------------|--------------------------------------------------------|
| GFP   | 1277124   | 12                    | 48.10%              | 5.8                | AEVKFEGDTLVNR<br>FSVSGEGEGDATYGK                       |
| AdhE  | 15801467  | 24                    | 34.30%              | 14.8               | IAELAGFSVPENTK<br>AVTNVAELNALVER                       |
| RpoB  | 110345914 | 43                    | 35.90%              | 25.4               | FIEQDPEGQYGLEAAFR<br>STGSYSLVTTQQPLGGK<br>LIEVPVEYIAGK |
| RpoC  | 85676082  | 46                    | 37.10%              | 35.1               | VIDIWAAANDR<br>VTAEDVLKPGTADILVPR<br>LGIQAFEPVLIIEGK   |
| PheT  | 73855444  | 15                    | 22.70%              | N/O                | IGFVGVVHPELER<br>IEGGIVVR<br>LDDNTIEISVTPNR            |
| EF-G  | 223649    | 37                    | 71.70%              | 24.5               | GGVIPGEYIPAVDK<br>IATDPFVGNLTFFR                       |
| TnaA  | 91074807  | 23                    | 53.20%              | 26.6               | AVEIGSFLGR<br>GNFDLEGLER                               |
| AceE  | 99032369  | 19                    | 44.70%              | 17.7               | FNIDADKVNPR<br>AQYLIDQLLAEAR                           |
| PflB  | 6730181   | 13                    | 53.70%              | 22.9               | TSTFLDVYIER<br>SGVLTGLPDAYGR                           |
| GroEL | 61679908  | -                     | -                   | -                  | AAVEEGVVAGGGVALIR<br>DTTTIIDGVGEEAAIQGR                |
| PtsA  | 110344192 | 23                    | 39.20%              | 4.8                | ALLKKEDEVIDR<br>EENPFLGWR                              |
| AtpA  | 148137    | 19                    | 47.10%              | 8.0                | EAFPGDVFYLSHR<br>DRGEDALIIYDDLK                        |
| AtpB  | 75197628  | 18                    | 50.80%              | 10.3               | DVLLFVDNIYR<br>QLDPLVVGQEHYDTR                         |
| ThrS  | 75195791  | 19                    | 26.10%              | 9.4                | TLTQEDVEALEKR                                          |
| Pck   | 1943496   | 17                    | 44.00%              | 4.1                | VIFLTADAFGLVPPVSR<br>EAEPEIYAAIRR                      |
| TreC  | 12519243  | 24                    | 39.10%              | 10.2               | DGEPETPPNWR,<br>NDGRDADELLAILASK                       |
| GadB  | 81245467  | 16                    | 31.90%              | 6.2                | YWDVELR<br>LKDGEDPGYTLYDLR                             |
| PykF  | 110641972 | 18                    | 48.60%              | 4.3                | TAALIGVDYLAVSFPR<br>TAAILLDTKGPEIR                     |
| LysU  | 9954999   | 31                    | 54.90%              | 20.5               | GANEAIDFNDEL<br>WDLGDIIGAR                             |
| DnaK  | 75194239  | 23                    | 40.30%              | 17.6               | SLGQFNLDGINPAPR<br>VAEFFGKEPR                          |
| RpsA  | 110614467 | 25                    | 64.00%              | 23.6               | GATVELADGVEGYLR<br>AFLPGSLVDVRPVR                      |
| OppA  | 147014    | 19                    | 37.30%              | 2.0                | TFLDTR<br>VTDEAHGTALYTKAEQQLDK                         |
| Oma87 | 75226693  | 20                    | 29.30%              | 11.4               | DIHFEGLR<br>GLEDFFYSVVGK                               |
| PutA  | 115512334 | 30                    | 21.30%              | N/O                | ATRDALIR<br>VMEELYPR<br>AQMDGLEGYPVYTR                 |
| Pgk   | 26249339  | 16                    | 61.10%              | 12.9               | DYLDGDVAEGELVVLENVR<br>SLYEADLVDEAKR                   |
| OmpF  | 6729727   | 10                    | 53.40%              | 10.7               | NSNFFGLVDGLNFAVQYLK<br>YADVGSFDYGR                     |
| GapA  | 146099    | 11                    | 44.10%              | 13.9               | AGIALNDNFVK<br>VPTPNVSVVDLTVR                          |
| FbaA  | 12517457  | 10                    | 40.40%              | 6.3                | ANEAYLQQLGNPK<br>LLPWIDGLLDAGEK                        |
| Rho   | 25299646  | 20                    | 45.90%              | 14.8               | VNEVNFDKPENAR<br>VLTGGVDANALHRPK                       |
| SucC  | 110342528 | 15                    | 37.30%              | 14.2               | GLTDAQQVVAAVEGK<br>LGADGNALFR                          |
| Gnd   | 146940    | 15                    | 30.50%              | 5.7                | AGAGTDAIDSCLKPYLDK<br>DYFGAHTYKR<br>EFVESLETPRR        |
| EF-Tu | 110345172 | 37                    | 61.00%              | 24.5               | GITINTSHVEYDTPTR<br>VGEEVEIVGIKETQK                    |
| GatZ  | 91211381  | 13                    | 41.60%              | 7.8                | EAIFALAQIEQELIAPENR<br>TGFNDSLLDIR                     |
| rpsC  | 12517946  | 11                    | 52.60%              | N/O                | VVADIAGVPAQINIAEVR<br>KVVADIAGVPAQINIAEVR              |
| OmpA  | 51235578  | 12                    | 51.90%              | 16.2               | LGYPITDDLDIYTR<br>SDVLFNFK                             |

|       |           |    |        |      |                                                                       |
|-------|-----------|----|--------|------|-----------------------------------------------------------------------|
| GatY  | 89108914  | 11 | 59.60% | 4.7  | SVMIDASHLPFAQNISR<br>VKEVVDFCHR                                       |
| Mdh   | 1455852   | 16 | 61.70% | 1.7  | LFGVTTLDIIR<br>SDLFNVAGIVK                                            |
| Prs   | 75255057  | -  | -      | -    | VVADFLSSVGVDR<br>LFAGNATPELAQR                                        |
| RplF  | 110616701 | -  | -      | -    | GADKQVIGQVAADLR<br>HADNTLTFGPR                                        |
| GpmM  | 75189769  | 10 | 41.00% | N/O  | VIPYWNETILPR<br>FTGWYDVDLSEK                                          |
| Icd   | 33383669  | 14 | 42.90% | 6.7  | DVIADAFLLQILLR<br>TVTYDFER                                            |
| DapD  | 26246112  | 13 | 49.50% | 9.5  | EAVNQVIALLDGALR<br>FADYDEAR                                           |
| RplA  | 110617382 | 9  | 47.60% | N/O  | FVESVDVAVNLGIDAR<br>SDQNRGATVLPHTGR                                   |
| RbsB  | 576079    | 11 | 53.30% | 5    | FNVLASQPADFDR<br>ILLINPTDSDAVGNAVK                                    |
| RpsB  | 110341980 | 9  | 51.90% | N/O  | MATVSMRDMLK<br>TVPMFNEALAEK                                           |
| Dps   | 85376196  | 14 | 78.40% | 4.8  | DLDKFLWFIESNIE<br>GANFIAVHEMLDGR<br>AVQLGGVALGTTQVINSK                |
| RplJ  | 110345912 | -  | -      | -    | AAAFEGELIPASQIDR<br>LATLPTYEEAIAR                                     |
| RplE  | 110345139 | -  | -      | -    | LLDNAAADLAAISGKPLTK<br>ALLAAFDFPFRK                                   |
| RplM  | 91212650  | 11 | 66.40% | N/O  | VYAGNEHNHAAQQPVLDI<br>DWYVVDATGK                                      |
| OmpX  | 81244671  | 10 | 73.30% | N/O  | INDWASIYGVVGVGYGK<br>SVDVGTWIAGVGYR                                   |
| RplP  | 83584670  | -  | -      | -    | VLYEMDGVPEELAR<br>GLAQGTDVSVFSGFLK<br>FKDHDFAAIADFDIVR<br>YIAETFLEDAR |
| DeoD  | 110346413 | 12 | 56.30% | 3.1  | YVDVGATYYFNK<br>FQDVGSFDYGR                                           |
| OmpC  | 9714150   | 16 | 65.40% | 9.2  | DSWGAAGQVGVVDYLNR<br>HEAGEFFMR                                        |
| OmpW  | 88192838  | 8  | 53.50% | N/O  | AYTPAWAEQITGVSR<br>EFHLDNPSQYFTDYVR<br>DFGESLLVYRPPIDTR               |
| NarG  | 75235264  | 17 | 15.50% | 12.1 | GLEEDAFIER<br>DGKEDHFHYEGGIK                                          |
| GyrA  | 290547    | 24 | 36.50% | 11.6 | AYPQEADEFTR<br>TEEQLANIAR                                             |
| TktA  | 115514288 | 17 | 31.60% | 8.8  | DVAEILLEGLR<br>FIFLEEGDIAEITR                                         |
| GlmS  | 290577    | 25 | 45.20% | 9.3  | TGDIVEYLVK<br>TIAELVEQFNLPK                                           |
| ProRS | 227122    | 21 | 40.00% | 4.7  | YDKDYSSYPYQTVK<br>SKQWEGAFEGLTAGVNR                                   |
| BtuB  | 145440    | 20 | 50.10% | 2.4  | MLEVLDIPR<br>VKWILDHVEGSR                                             |
| GlpK  | 1134966   | 16 | 35.30% | 6.1  | LREEFGVYAVASGR<br>GLEEDAEGLR                                          |
| AspC  | 1127182   | 8  | 17.60% | 1.9  | IIVVSDEVAADTVR<br>DDDPSFDELVALAVETGR                                  |
| ManX  | 15802230  | 17 | 54.60% | 1.7  | LAFDEFDELADR<br>LIDSIPEPLGGAHR                                        |
| AccA  | 26246132  | 14 | 41.20% | N/O  | NDTYLEYEAFK<br>FSIDKLTNTDLSFGPFK<br>LTNTDLSFGPFK                      |
| Tsx   | 26246416  | 11 | 44.10% | 1.9  | DYLANDGYR<br>VTKPEAGHFAK                                              |
| RplC  | 15803847  | 11 | 58.60% | 2.6  | YAMIGDPTGALTR<br>LGVVDVYAVSTDTHFTHK                                   |
| AhpC  | 15800320  | 13 | 60.10% | 1.7  | NIEFFEAR<br>AGDEGKLFSGITR                                             |
| RplI  | 15804792  | 9  | 52.70% | N/O  |                                                                       |

**Supplementary Table S3: PAP I-GFP isolation from wild type cells in the presence of RNase**

|         | <b>gi number</b> | <b># of peptides from MS</b> | <b>% Sequence Coverage</b> | <b>XProteo score [d']</b> | <b>Peptides confirmed by MS/MS</b>                    |
|---------|------------------|------------------------------|----------------------------|---------------------------|-------------------------------------------------------|
| PAP I   | 89107024         | 24                           | 42.9%                      | 36.1                      | LATLLNDIAPPAR<br>DNIFGSIEEDAQR                        |
| RNase E | 26247224         | 30                           | 43.4%                      | 33.3                      | ISPETA EIPIR<br>DFDVTTNATPEQVR                        |
| RNase R | 83585083         | 31                           | 34.3%                      | 34.2                      | GDISEFAPR<br>IEEITAEIEVGR                             |
| PNPase  | 110643405        | 14                           | 20.0%                      | 13.2                      | EFILEHLTK<br>DLPLVTIDGEDAR                            |
| HrpA    | 75239959         | 10                           | 6.5%                       | N/O                       | YVIDPGTAR<br>ERGLQDLK                                 |
| SrmB    | 75234075         | 12                           | 25.0%                      | 10.2                      | AVETLILDEADR<br>LLEDPVEVSANPSTR                       |
| Eno     | 15803300         | 6                            | 14.0%                      | 3.6                       | IQLVGDDL FVTNTK<br>AFTEEFTHFLEELTK                    |
| RhlB    | 148184           | 10                           | 20.5%                      | 8.5                       | LLQTLIEEWPDR<br>VLESGVDILIGTTR                        |
| Hfq     | 15804761         | 4                            | 20.0%                      | 3.7                       | GQSLQDPFLANALRR<br>GQSLQDPFLANALR<br>AKGQSLQDPFLANALR |

**Supplementary Table S4: PAP I-GFP isolation in *ΔsprE* cells**

| Protein Information |           | Summary     |            | Exponential Phase  |                     |                    |                                                      | Stationary Phase   |                     |                    |                                  |
|---------------------|-----------|-------------|------------|--------------------|---------------------|--------------------|------------------------------------------------------|--------------------|---------------------|--------------------|----------------------------------|
| Name                | gi #      | Exponential | Stationary | # peptides from MS | % sequence coverage | XProteo Score [d'] | Peptides confirmed by MS/MS                          | # peptides from MS | % sequence coverage | XProteo Score [d'] | Peptides confirmed by MS/MS      |
| GFP-tag             | 26892271  | +           | +          | 10                 | 40.6%               | 7.5                | AEVKFEGDTLVNR<br>TIFFKDDGNYK<br>GIDFKEDGNILGHK       | 10                 | 45.6%               | 2.9                | TIFFKDDGNYK<br>AEVKFEGDTLVNR     |
| PAP I               | 89107024  | +           | +          | 26                 | 54.1%               | 30.2               | AGYAEWLVGGGVR<br>DIWQLQR<br>AAYDLLALR                | 30                 | 55.8%               | 35.8               | DNIFGSIEEDAQR<br>AAYDLLALR       |
| Rne                 | 16129047  | +           | +          | 35                 | 41.4%               | 22.8               | IEPSLEAAFVDYGAER<br>SAEALQWDLSFR                     | 17                 | 17.0%               | N/O                | DNESLSLSILR<br>SAEALQWDLSFR      |
| Pnp                 | 110643405 | +           | -          | 15                 | 23.0%               | 9.1                | GDISEFAPR<br>IEEITAEIEVGR<br>EGRPSEGETLIAR           | -                  | -                   | -                  | -                                |
| Eno                 | 563868    | +           | -          | 12                 | 33.1%               | N/O                | IQLVGDDLFTNTK<br>FNQIGSLTETLAAIK                     | -                  | -                   | -                  | -                                |
| RhlB                | 148184    | +           | -          | 14                 | 39.8%               | 5.1                | DIRWLFR<br>MYDLGFIKDIR<br>IKEELFYSNEEK               | -                  | -                   | -                  | -                                |
| Hfq                 | 15804761  | +           | +          | 3                  | 30.1%               | 2.8                | GQSLQDPFLNALR<br>LQGQIESFDQFVILLK<br>AKGQSLQDPFLNALR | 2                  | 14.6%               | 1.8                | AKGQSLQDPFLNALR<br>GQSLQDPFLNALR |
| HrpA                | 49176106  | +           | +          | 19                 | 12.7%               | N/O                | ERGLQDLK<br>HALVEGDWQTR<br>EVWMIEELR                 | 19                 | 9.7%                | N/O                | ESDLLAFVNLWNYLGEQQK<br>YVIDPGTAR |
| Rnr                 | 91214001  | +           | -          | 10                 | 5.5%                | N/O                | EKVVLDDDDVFK                                         | -                  | -                   | -                  | -                                |
|                     |           |             |            |                    |                     |                    |                                                      |                    |                     |                    |                                  |
| RpoC                | 409789    | +           | +          | 34                 | 23.6%               | 19.6               | * See GFP control isolation                          | 48                 | 30.1%               | 35.2               | *See GFP control isolation       |
| RpoB                | 15804577  | +           | +          | 37                 | 26.7%               | 18.6               |                                                      | 46                 | 31.4%               | 32.8               |                                  |
| AceE                | 434010    | +           | +          | 25                 | 24.9%               | 17                 |                                                      | 31                 | 35.4%               | 25.3               |                                  |
| AdhE                | 15801467  | -           | +          | -                  | -                   | -                  |                                                      | 32                 | 38.6%               | 30.2               |                                  |
| PflB                | 15800764  | +           | +          | 13                 | 13.3%               | N/O                |                                                      | 36                 | 45.8%               | 29.3               |                                  |
| TnaA                | 41936     | -           | +          | -                  | -                   | -                  |                                                      | 19                 | 37.9%               | 14.4               |                                  |
| RpsA                | 223404    | +           | +          | 25                 | 43.4%               | 22.2               |                                                      | 24                 | 50.9%               | 21.6               |                                  |
| EF-Tu               | 26249935  | +           | +          | 20                 | 58.0%               | 16                 |                                                      | 25                 | 47.8%               | 19.3               |                                  |

|      |          |   |   |    |       |      |  |    |       |      |  |
|------|----------|---|---|----|-------|------|--|----|-------|------|--|
| RpoA | 42812    | + | - | 11 | 42.7% | 10.1 |  | -  | -     | -    |  |
| Pgk  | 1942721  | - | + | -  | -     | -    |  | 17 | 64.5% | 2.5  |  |
| OmpF | 26246956 | - | + | -  | -     | -    |  | 14 | 54.5% | 11   |  |
| OmpC | 16130152 | + | + | 10 | 42.7% | 4.9  |  | 15 | 56.0% | 12.5 |  |
| EF-G | 33357902 | + | + | 22 | 67.4% | 25.6 |  | 12 | 42.7% | 9.2  |  |
| RpsD | 15803823 | + | - | 10 | 37.2% | 2.3  |  | -  | -     | -    |  |
| RplL | 223571   | + | + | 14 | 37.7% | 2.3  |  | 15 | 50.2% | 2.1  |  |
| RpsC | 15803841 | + | + | 6  | 28.6% | N/O  |  | 9  | 41.5% | 2.5  |  |
| RplA | 15804574 | + | + | 8  | 35.7% | N/O  |  | 9  | 43.0% | N/O  |  |
| RplD | 15803846 | + | - | 10 | 51.0% | 2.1  |  | -  | -     | -    |  |
| Dps  | 91071421 | - | + | -  | -     | -    |  | 10 | 50.3% | 2.9  |  |
| RplI | 15804792 | + | + | 12 | 74.7% | 13.4 |  | 10 | 55.3% | 6.8  |  |
| RplQ | 16131180 | + | + | 12 | 69.7% | 9.4  |  | 7  | 39.1% | N/O  |  |
| RpsK | 15803824 | + | - | 9  | 66.2% | 6.8  |  | -  | -     | -    |  |
| RpsJ | 15803848 | + | + | 10 | 60.6% | 6.3  |  | 10 | 72.1% | 2.8  |  |
| RplY | 15802741 | + | + | 11 | 87.4% | 12.6 |  | 8  | 55.8% | N/O  |  |
| OmpX | 30749947 | + | + | 8  | 58.4% | 3.8  |  | 8  | 62.8% | 4.5  |  |
| Rho  | 15833970 | + | - | 16 | 25.7% | 6.6  |  | -  | -     | -    |  |
| PrsA | 75228259 | + | + | 15 | 45.4% | 11.2 |  | 13 | 37.0% | 3.1  |  |
| RplB | 15803844 | + | - | 8  | 27.7% | N/O  |  | -  | -     | -    |  |
| RpsB | 26246115 | + | - | 6  | 32.5% | N/O  |  | -  | -     | -    |  |
| RplM | 15803765 | + | + | 16 | 72.7% | 21.6 |  | 10 | 61.5% | 8.0  |  |
| RplJ | 15804575 | + | + | 6  | 44.0% | N/O  |  | 9  | 57.2% | 2.4  |  |
| RplC | 15803847 | + | - | 17 | 66.7% | 10.3 |  | -  | -     | -    |  |
| DnaK | 75235743 | - | + | -  | -     | -    |  | 12 | 22.8% | 2.5  |  |
| AtpA | 15804334 | - | + | -  | -     | -    |  | 15 | 39.3% | 7.5  |  |
| AtpB | 15804332 | - | + | -  | -     | -    |  | 17 | 38.6% | 8.7  |  |
| LysU | 7523127  | - | + | -  | -     | -    |  | 21 | 32.2% | 11.3 |  |
| PykF | 1310978  | - | + | -  | -     | -    |  | 17 | 47.8% | 12.5 |  |
| PckA | 1942693  | - | + | -  | -     | -    |  | 14 | 31.4% | 3.6  |  |
| TreC | 16132061 | - | + | -  | -     | -    |  | 12 | 23.7% | 2.8  |  |
| GapA | 1421424  | - | + | -  | -     | -    |  | 17 | 57.1% | 11.6 |  |
| RplE | 15803835 | - | + | -  | -     | -    |  | 10 | 56.7% | 5.1  |  |

**Supplementary Table S5:** Detection of Interacting partners in Flow Through

| Name | gi #      | Wild-type          |                     |                    | Peptides confirmed by MS/MS <sup>a</sup>      | <i>ΔsprE</i>       |                     |                    |
|------|-----------|--------------------|---------------------|--------------------|-----------------------------------------------|--------------------|---------------------|--------------------|
|      |           | # peptides from MS | % sequence coverage | XProteo Score [d'] |                                               | # peptides from MS | % sequence coverage | XProteo Score [d'] |
| Rne  | 26247224  | 39                 | 42.2%               | 8.7                | GMLNELDEEPSR<br>ISPETAETPIR<br>DFDVTTNATPEQVR | 25                 | 29.9%               | 12.1               |
| Pnp  | 110643405 | 27                 | 43.7%               | 12.3               | GDISEFAPR<br>EGRPSEGETLIAR<br>IEEITAEIEVGR    | 20                 | 33.0%               | 7.0                |
| Eno  | 15803300  | 13                 | 35.1%               | N/O                | IQLVGDDLFVTNTK<br>FNQIGSLTETLAAIK             | 11                 | 29.4%               | N/O                |
| RhlB | 148184    | 8                  | 14.0%               | N/O                | LLQTLIEEWPDR<br>YNPDALMTDLPKPLR               | 5                  | 10.3%               | N/O                |
| HrpA | 75239959  | 50                 | 26.5%               | 7.7                | ERGSLQDLK<br>YVIDPGTAR                        | 35                 | 24.1%               | N/O                |
| Rnr  | 83585083  | 35                 | 23.7%               | 4.2                | EFILEHLTK<br>VNFEPDSAFR<br>DLPLVTIDGEDAR      | 29                 | 22.0%               | 7.3                |
| SmrB | 75234075  | 8                  | 15.5%               | N/O                | VHELANWLR<br>LLEDPVEVSANPSTR                  | 5                  | 13.3%               | N/O                |

<sup>a</sup>The same peptides were confirmed for both strains.

**Supplementary Table S6: PAP I-GFP isolation from rssA2 cells**

|         | <b>gi number</b> | <b># of peptides from MS</b> | <b>% Sequence Coverage</b> | <b>XProteo score [d']</b> | <b>Peptides confirmed by MS/MS</b>               |
|---------|------------------|------------------------------|----------------------------|---------------------------|--------------------------------------------------|
| PAPI    | 89107024         | 29                           | 50.0%                      | 25.9                      | AAYDLLALR<br>GMLNELDEESPR                        |
| RNase E | 16129047         | 7                            | 10.2%                      | 3.3                       | APAPEYVPEAPR<br>SAEALQWDLSFR<br>IEPSLEAAFVDYGAER |
| RNase R | 83585083         | 22                           | 25.2%                      | 9.3                       | FDQVGQR<br>AKEPALFR<br>DLPLVTIDGEDAR             |
| PNPase  | 75187972         | 13                           | 14.9%                      | 5.5                       | GDISEFAPR<br>IEEITAEIEVGR                        |
| HrpA    | 75190465         | 16                           | 17.2%                      | 10.2                      | EGRSLQDLK<br>ESDFLAFVNLWNYLGEQQK                 |
| SmrB    | 15832696         | 21                           | 52.8%                      | 20.9                      | GGVDVLVATPGR<br>AVAEQGYR                         |
| Eno     | 15803300         | 10                           | 35.0%                      | 4.6                       | IQLVGDDLFTNTK<br>AFTEEFTHFLEELTK                 |
| RhlB    | 148184           | 7                            | 12.3%                      | 0.8                       | VLESGVDILIGTTGR<br>EELFYPSNEEKMR                 |
| Hfq     | 15804761         | 2                            | 15.0%                      | 1.2                       | GQSLQDPFLANALR<br>AKGQSLQDPFLANALR               |
| SprE    | 26247564         | -                            | -                          | -                         | LPELAGLLK                                        |



**Supplementary Table S7: PAP I-GFP isolation from *ArpoS* cells**

|         | <b>gi number</b> | <b># of peptides from MS</b> | <b>% Sequence Coverage</b> | <b>XProteo score [d']</b> | <b>Peptides confirmed by MS/MS</b>                    |
|---------|------------------|------------------------------|----------------------------|---------------------------|-------------------------------------------------------|
| PAP I   | 89107024         | 29                           | 48.5%                      | 42.8                      | LATLLNDIAPPAR<br>DNIFGSIEEDAQR                        |
| RNase E | 26247224         | 11                           | 13.3%                      | 9.9                       | ISPETAEPIPR<br>DFDVTTNATPEQVR                         |
| RNase R | 83585083         | 21                           | 20.4%                      | 27.3                      | EFILEHLTK<br>DLPLVTIDGEDAR                            |
| PNPase  | 110643405        | 15                           | 26.8%                      | 18                        | GDISEFAPR<br>EGRPSEGETLIAR                            |
| HrpA    | 75239959         | 25                           | 27.6%                      | 15.5                      | YVIDPGTAR<br>YRPIVEEADDTER                            |
| SrmB    | 75234075         | 15                           | 30.0%                      | 14.3                      | AVETLILDEADR<br>LLEDPVEVSANPSTR                       |
| Eno     | 15803300         | 7                            | 15.9%                      | 4.6                       | IQLVGDDLVTNTK<br>AFTEEFTHFLEELTK                      |
| RhlB    | 148184           | 12                           | 25.0%                      | 4                         | LLQTLIEEWPDR<br>YNPDALMTDLPKPLR                       |
| Hfq     | 15804761         | 3                            | 18.0%                      | 3.2                       | GQSLQDPFLANALRR<br>GQSLQDPFLANALR<br>AKGQSLQDPFLANALR |
